# Supplementary material
Source: PubMed Central journal article supplement (PMC3442880)
Supplement: auto-8-1333-s01.pdf [file auto-8-1333-s01.pdf]

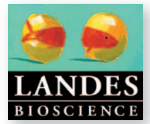

## **Supplemental Material to:**

**David H. Kessel, Michael Price and John J. Reiners**

**TG7 deficiency suppresses apoptosis and cell death  
induced by lysosomal photodamage**

**Autophagy 2012; 8(9)**

**<http://dx.doi.org/10.4161/auto.20792>**

**[www.landesbioscience.com/journals/autophagy/article/20792](http://www.landesbioscience.com/journals/autophagy/article/20792)**

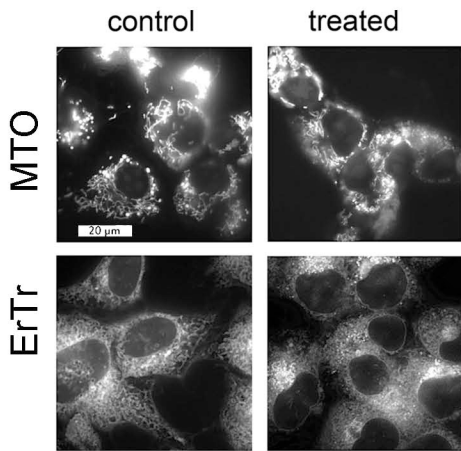

Figure S1

Effect of an LD<sub>90</sub> PDT dose of WST11 on the labeling patterns of mitotracker orange and ER tracker on WT 1c1c7 cells.

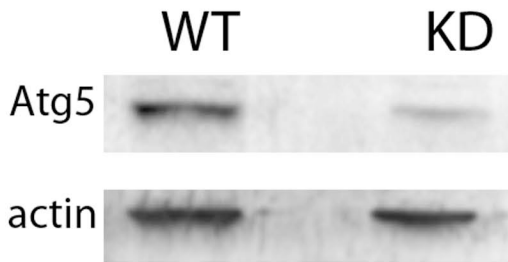

Figure S2

Western blots showing the extent of the ATG5 knockdown

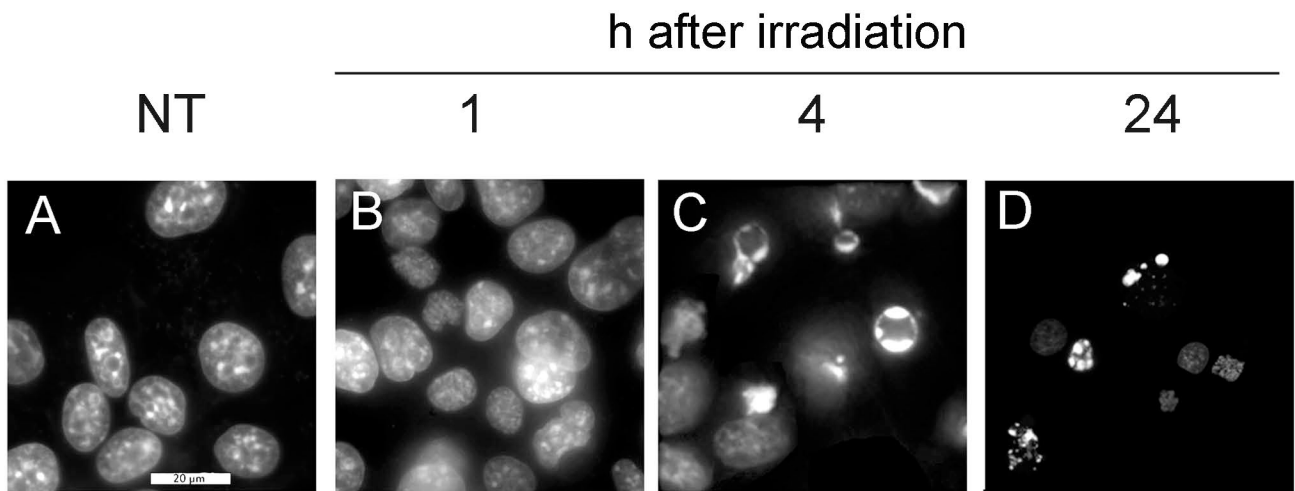

Figure S3

HO33342 labeling of nuclei showing the apoptotic response to an LD<sub>90</sub> PDT dose with WST11 in the ATG5-KD cell line. A = controls, B-D = cells at specified intervals after irradiation. B = 1h, C = 4h, D = 24 h.

Figure S1. Effect of an LD90 PDT dose of WST11 on the labeling patterns of MitoTracker Orange and ER-Tracker on WT 1c1c7 cells

Figure S2. Western blots showing the extent of the ATG5 knockdown

Figure S3. HO342 labeling of nuclei showing the apoptotic response to an LD90 PDT dose with WST11 in the ATG5-KD cell line. A = control, B-D = cells at specified intervals after irradiation. B = 1 h, C = 4 h, D = 24 h.
